# Supplementary material
Source: PubMed Central journal article supplement (PMC1698877)
Supplement: 7601425s5.pdf [file 7601425s5.pdf]

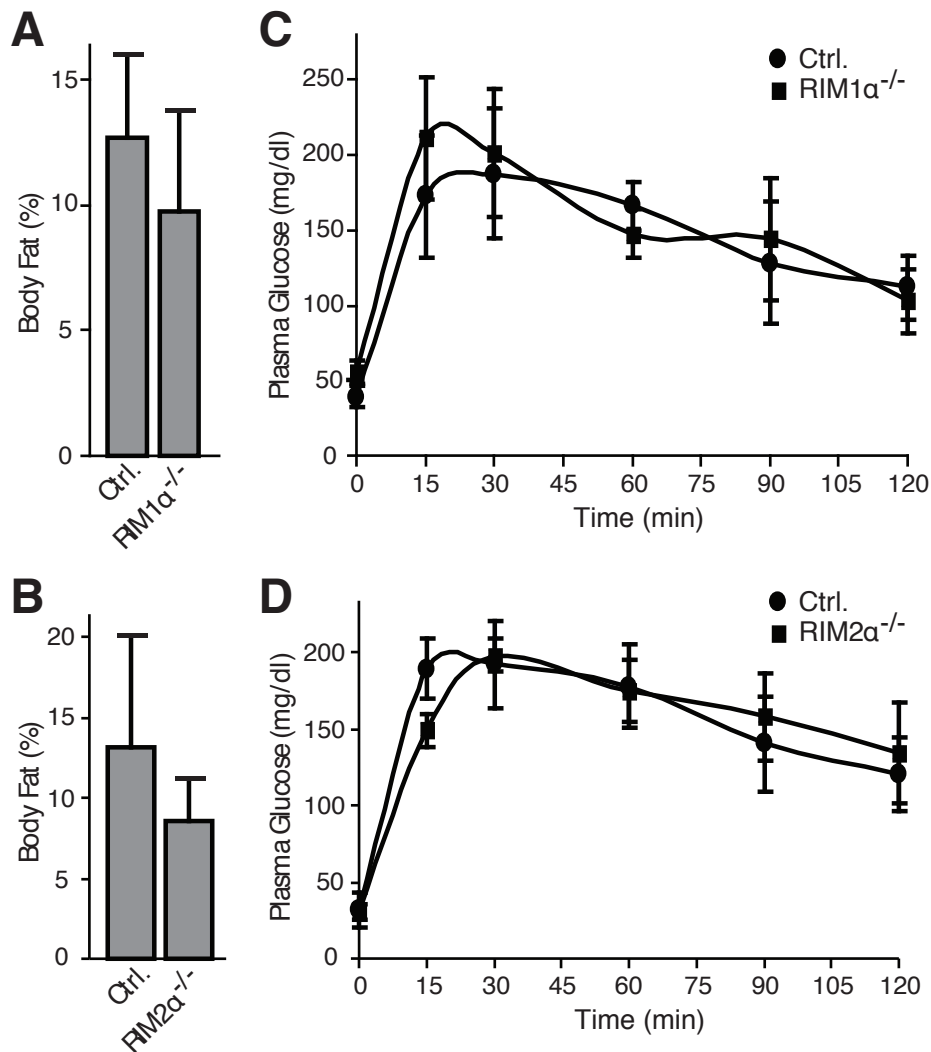

**Suppl. Fig. 5:**

$\alpha$ -RIM KO mice exhibit comparable body fat levels and glucose tolerance as littermate controls. Body fat levels of RIM1 $\alpha$  (A), RIM2 $\alpha$  (B) and their respective littermate controls were determined by NMR. Deletion of either RIM1 $\alpha$  or RIM2 $\alpha$  had no effect on body fat levels of the mice. Intraperitoneal glucose (2 mg/g of body weight) tolerance tests (C and D) were performed on the same mice after an overnight fast, and glucose levels measured as described under “Materials and Methods”. N=3 pairs for RIM1 $\alpha$  and 4 pairs for RIM2 $\alpha$  measurements. Data are presented as means  $\pm$  S.E.M.s.
